# Supplementary material
Source: Springer Nature journal article supplement (https://www.springermedizin.de/resource/supplementary/12891_2011_1237_MOESM2_ESM.pdf/9507416)
Supplement: MOESM2 [file 9507416]

Patients with non-specific low back pain and physicians' referral for physical therapy

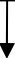

Eligibility check and informed consent

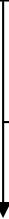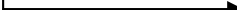

Exclusion of patients, no informed consent

Pre-treatment assessment

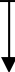

Randomisation

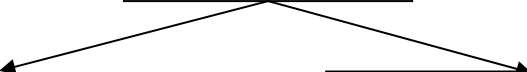

Movement control exercise  
9-18 sessions in max. 12 weeks

General exercise  
9-18 sessions in max. 12 weeks

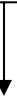

Assessments post-treatment,  
6 and 12 months

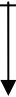

Assessments post-treatment,  
6 and 12 months
